# Supplementary material
Source: publisher figshare collection journal article supplement (https://gsapubs.figshare.com/ndownloader/files/31310248)
Supplement: Supplementary file 1 [file 31310248]

Chuanyong Wu, Guangxue Ren, Siyu Wang, Xue Yang, Gan Chen, Lei Duan, Zhuqi Zhang, Wenjun Zheng, Chuanyou Li, Zhikun Ren, Qiyun Lei, and Dongli Zhang, 2021, Late Quaternary active faulting on the inherited Baoertu basement fault within the eastern Tian Shan orogenic belt: Implications for regional tectonic deformation and slip partitioning, NW China: GSA Bulletin, <https://doi.org/10.1130/B35887.1>.

## Supplemental Material

**Figure S1.** Profile of velocity components normal to structure striking (E-W components) across the eastern Tian Shan (profile from (85.3°, 41.0°) to (85.3°, 45.0°) with a width of 240 km; see Fig. 1A for the profile location). GPS data are from Wang and Shen (2020), and the red line represents the BF.

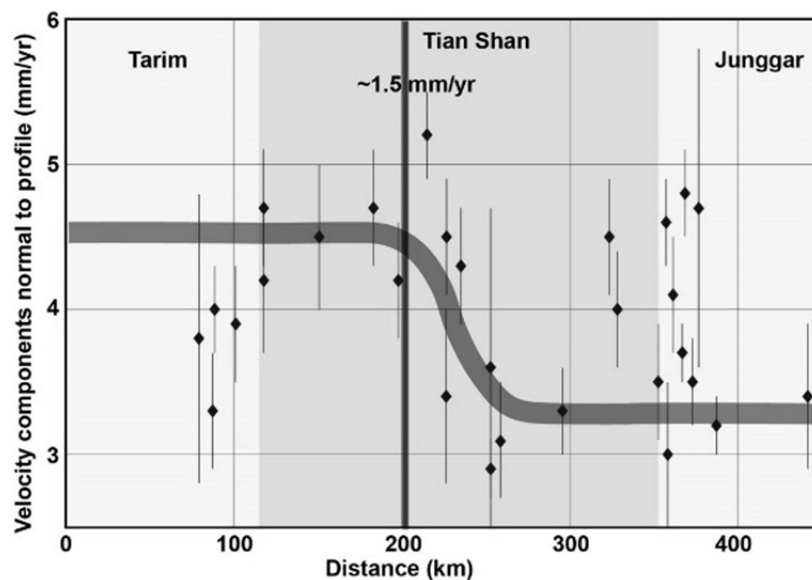

## REFERENCE CITED

Wang, M., and Shen, Z.K., 2020, Present-day crustal deformation of continental China derived from GPS and its tectonic implications: Journal of Geophysical Research: Solid Earth, v. 125, no. e2019JB018774, <https://doi.org/10.1029/2019JB018774>.
